# Supplementary material for: Bio-Synthesis of Aspergillus terreus Mediated Gold Nanoparticle: Antimicrobial, Antioxidant, Antifungal and In Vitro Cytotoxicity Studies
Source: MDPI journal article supplement (doi:10.3390/ma15113877), 2022-05-29
Supplement: s1 [file s1]

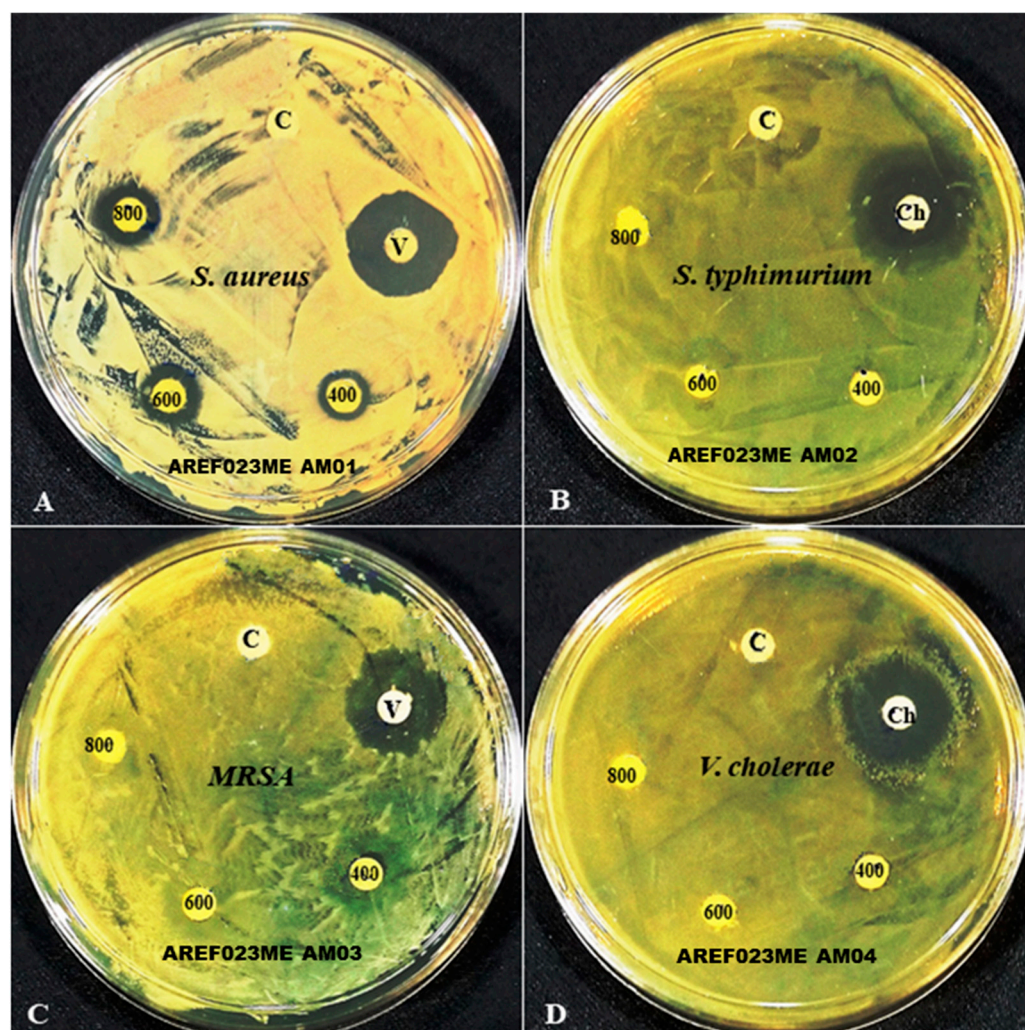

**Figure S1.** Zones of inhibition produced by AREF023 Methanol extract (ME), against bacterial pathogens (A)—*S. aureus*, (B)—*S. typhimurium*, (C)—Methicillin-resistant *S. aureus* (MRSA and; (D)—*V. cholerae*. [V—Vancomycin; Ch—Chloramphenicol; 400—AREF023 ME 400 µg/ml; 600—AREF023 ME 600 µg/ml; 800—AREF023 ME 800 µg/ml; C— Control].

**Table S1.** Antimicrobial activities of AREF023 methanol extract (ME).

| Concentrations (µg/ml)        | Diameter of zone of inhibition (mm)* against pathogenic bacteria |                       |                                        |                    |
|-------------------------------|------------------------------------------------------------------|-----------------------|----------------------------------------|--------------------|
|                               | <i>S. aureus</i>                                                 | <i>S. typhimurium</i> | Methicillin resistant <i>S. aureus</i> | <i>V. cholerae</i> |
| DMSO (control)                | 0                                                                | 0                     | 0                                      | 0                  |
| AREF023 ME 400                | 4.03 ± 0.15                                                      | 0                     | 0                                      | 0                  |
| AREF023 ME 600                | 5.27 ± 0.24                                                      | 0                     | 0                                      | 0                  |
| AREF023 ME 800                | 6.42 ± 0.39                                                      | 0                     | 0                                      | 0                  |
| Vancomycin (25 µg/ disk)      | 8.83 ± 0.28                                                      | -                     | 8.63 ± 0.23                            | -                  |
| Chloramphenicol (25 µg/ disk) | -                                                                | 7.28 ± 0.25           | -                                      | 8.31 ± 0.21        |

\*: mean diameter on zone of inhibition ± Standard Deviation (n = 3). -: indicates not applied.

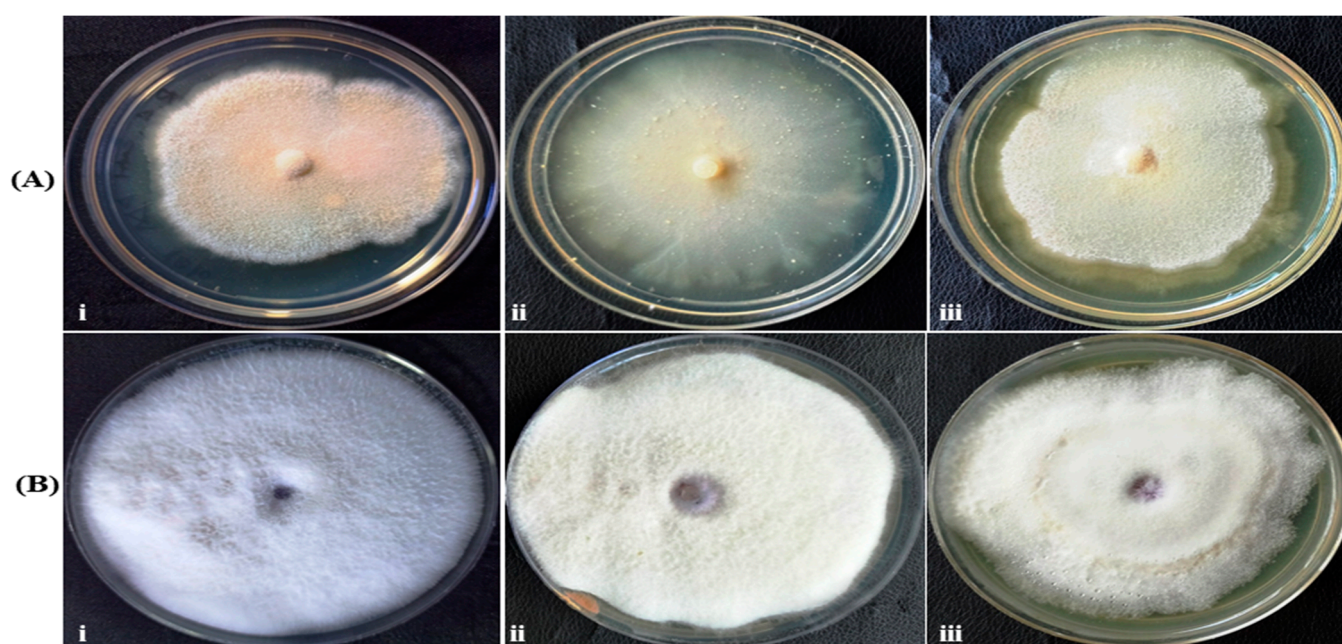

**Figure S2.** Antifungal activity of AREF023 methanol extract against plant pathogenic fungi (A) *Rhizoctonia solani* and (B) *Fusarium oxysporum*. PDA plates were amended with different concentrations of AREF023 ME (i) control, (ii) 200 µg/mL, and (iii) 400 µg/mL of methanol extract of AREF023 strain.

**Table S2.** Antifungal activity of AREF023 methanol extract on in vitro mycelia growth of plant pathogenic fungi.

| Pathogenic fungal strain  | Percentage Inhibition (%)* mycelial growth after AREF023 ME (µg/ml) treatment |             |             |
|---------------------------|-------------------------------------------------------------------------------|-------------|-------------|
|                           | Control                                                                       | 200 µg/ml   | 400 µg/ml   |
| <i>Rhizoctonia solani</i> | 0                                                                             | 3.76 ± 0.3  | 9.49 ± 0.34 |
| <i>Fusarium oxysporum</i> | 0                                                                             | 2.51 ± 0.21 | 4.64 ± 0.28 |

\*: mean % inhibition of fungal mycelium ± Standard Deviation (n = 3).

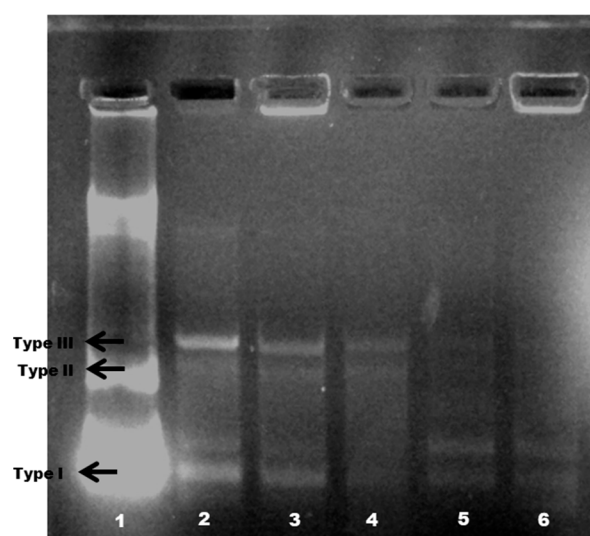

**Figure S3.** Development of a pBSKDNA nicking assay with *A. terreus* AREF023 methanol extract. Lane 1—Native pBSK DNA, Lane 2—pBSK DNA with Fenton's reagent, Lane 3—pBSK DNA with 25 µg/ml Curcumin and Fenton reagent, and Lanes 4 to 6—pBSK DNA with Fenton's reagent and AREF023 ME (100–300 µg/ml, respectively).

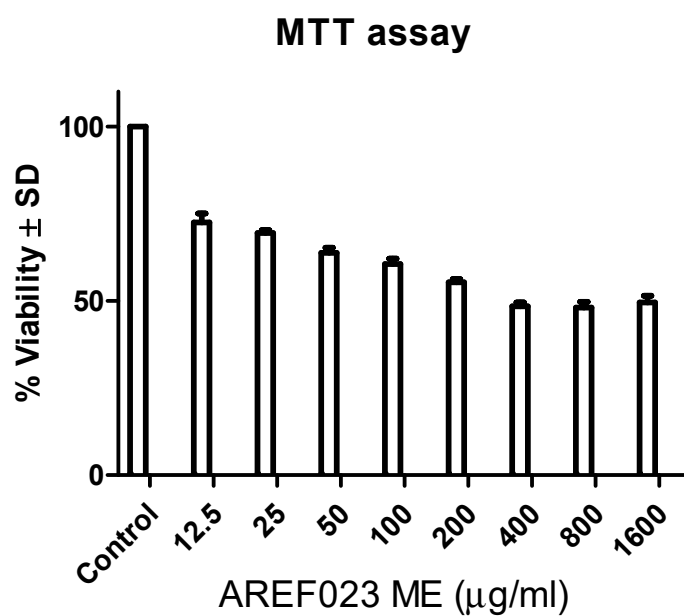

**Figure S4.** Effect of AREF023 methanol extract on HEK 293T normal cell line.
